# Supplementary material for: Maintenance of time-restricted eating and high-intensity interval training in women with overweight/obesity 2 years after a randomized controlled trial
Source: Springer Nature journal article supplement (doi:10.1038/s41598-025-95743-y), 2025-04-25
Supplement: MOESM2 [file 41598_2025_95743_MOESM2_ESM.pdf]

**Maintenance of time-restricted eating and high-intensity interval  
training in women with overweight/obesity 2 years after a  
randomized controlled trial**

Kamilla L. Haganes, John A. Hawley, Stian Lydersen, Trine Moholdt

## **Supplementary information**

*Table S1*

*Table S2 (Separate excel file)*

*Long-term adherence and perceptions questionnaire*

**Table S1.** Qualitative questionnaire responses on perceptions of time-restricted eating (TRE) and high-intensity interval training (HIIT) by n = 10 in TRE, n = 9 in HIIT, n = 19 in TREHIIT, n = 6 in CON.

| Perceptions of TRE                                                                                                                    | Group        |
|---------------------------------------------------------------------------------------------------------------------------------------|--------------|
| <i>Quote</i>                                                                                                                          |              |
| I have no problem not eating dinner. [I] became energetic, [and] also gained a stronger sense of self-esteem by doing so.             | TRE          |
| Difficult to compare, [I] have only changed dietary quality.                                                                          | TRE          |
| Works well to have focus and consciousness around food.                                                                               | TRE          |
| Almost never hungry in the morning anyway, a small sacrifice to give up dinner. Free to eat anything.                                 | TRE          |
| Can eat whatever you want, but [I'm] still a bit hungry.                                                                              | TRE          |
| It's okay to follow but hasn't yielded results.                                                                                       | TRE          |
| For the most part okay to follow over time.                                                                                           | TRE          |
| Quite easy to follow.                                                                                                                 | TRE          |
| Haven't tried any other [diets].                                                                                                      | TRE          |
| Simple rules, easy to understand what is required.                                                                                    | TRE          |
| A good combo of diet plan and time-restricted eating.                                                                                 | TREHIIT      |
| Simple and ok to follow. Avoids snacking in the evening.                                                                              | TREHIIT      |
| Don't like eating small meals frequently, [I] prefer two large meals instead.                                                         | TREHIIT      |
| Not very demanding, but little impact and not very motivating.                                                                        | TREHIIT      |
| Easy to understand and follow.                                                                                                        | TREHIIT      |
| A relief not having to eat breakfast. Saves time.                                                                                     | TREHIIT      |
| Easier to do once you get into the routine; when the cravings in the evenings are gone, it's easy.                                    | TREHIIT      |
| Quickly noticed stabilization of blood sugar throughout the day. Avoiding blood sugar peaks and lows. Don't feel hunger as intensely. | TREHIIT      |
| Easier to follow! Easier to be social.                                                                                                | TREHIIT      |
| Easy to understand and follow.                                                                                                        | TREHIIT      |
| Easy to follow.                                                                                                                       | TREHIIT      |
| It's simple. Watching the time.                                                                                                       | TREHIIT      |
| I find that it was easier to engage in fasting during the study due to little change in daily routines.                               | TREHIIT      |
| Easy to follow.                                                                                                                       | TREHIIT      |
| Easy to stick to the plan, better sleep, more consistent with water intake.                                                           | TREHIIT      |
| Doesn't impose restrictions on WHAT you eat, especially if you're invited somewhere, it's much easier to adapt.                       | TREHIIT      |
| Doesn't require much preparation or special acquirements. Just need to watch the timing.                                              | TREHIIT      |
| Don't know.                                                                                                                           | CON          |
| Don't need to think about what or how much you eat, only when.                                                                        | CON          |
| Much easier to maintain, no need for specific foods, requires no time commitment.                                                     | CON          |
| Cravings and hunger disappear quickly, and after a certain point, the weight drops rapidly without much effort.                       | CON          |
| <b>Perceptions of HIIT</b>                                                                                                            | <b>Group</b> |
| <i>Quote</i>                                                                                                                          |              |
| I enjoy [HIIT], but I also like other types [of exercise] (e.g., strength training, hiking).                                          | HIIT         |
| Terrible to run and feel like you can't breathe. Claustrophobic.                                                                      | HIIT         |

|                                                                                                                                                                                                                                |         |
|--------------------------------------------------------------------------------------------------------------------------------------------------------------------------------------------------------------------------------|---------|
| Not as fun to do, it's heavier.                                                                                                                                                                                                | HIIT    |
| I see that if I do interval training, it's better in terms of weight reduction.                                                                                                                                                | HIIT    |
| Doesn't take too long. Fun if the fitness level is okay.                                                                                                                                                                       | HIIT    |
| It doesn't take too long, and the variations [within the sessions] make the time pass faster.                                                                                                                                  | HIIT    |
| Tiring, but I see progress, fun.                                                                                                                                                                                               | HIIT    |
| Feel like I master it. Good feeling in the body afterwards.                                                                                                                                                                    | HIIT    |
| [I] like feeling the heart pumping.                                                                                                                                                                                            | HIIT    |
| A bit easier on the back and less muscle soreness.                                                                                                                                                                             | TREHIIT |
| Just a short half-hour, and you're done.                                                                                                                                                                                       | TREHIIT |
| Time-efficient and easy to perform without equipment.                                                                                                                                                                          | TREHIIT |
| Effective when you're short on time.                                                                                                                                                                                           | TREHIIT |
| Efficient. Rapid progression. Sense of mastery. Achieved more than I thought. Overcame barrier to outdoor jogging in sleet.                                                                                                    | TREHIIT |
| Both [resistance training and HIIT] require a discipline that I find difficult to muster.                                                                                                                                      | TREHIIT |
| Intense and effective, I like it a lot.                                                                                                                                                                                        | TREHIIT |
| Weight makes everything heavy; it needs to be combined with everyday life and the remaining energy and desire after work. Sometimes, it's physically better to take a 60-minute walk than endure 25 minutes of intense effort. | TREHIIT |
| I like that you quickly notice improvement in endurance.                                                                                                                                                                       | TREHIIT |
| It's manageable. Provides good results with a short training time.                                                                                                                                                             | TREHIIT |
| Efficient. Both timesaving and yield results rapidly.                                                                                                                                                                          | TREHIIT |
| Efficient, takes little time.                                                                                                                                                                                                  | TREHIIT |
| Quick and effective.                                                                                                                                                                                                           | TREHIIT |
| Yields results with minimal time-investment but requires significant discipline to endure the discomfort during high percentage of maximal heart rate.                                                                         | TREHIIT |
| Simple exercise, but heavy to start with after a break [from training].                                                                                                                                                        | TREHIIT |
| Effective.                                                                                                                                                                                                                     | TREHIIT |
| Effective, timesaving, pushes me to the limit, and I feel proud of it.                                                                                                                                                         | TREHIIT |
| Efficient, [you] get a lot of training done in a short amount of time. A good way to 'brain dump'.                                                                                                                             | TREHIIT |
| Time-efficient, don't need to plan much.                                                                                                                                                                                       | TREHIIT |
| Short, effective sessions that yield quick results.                                                                                                                                                                            | CON     |
| Efficient to carry out. Good effect in a short time.                                                                                                                                                                           | CON     |
| Effective and fun.                                                                                                                                                                                                             | CON     |
| Much better, [I] feel [I run] faster and in better shape, but it makes the next workout a bit challenging to approach as I dread the high level of exertion.                                                                   | CON     |
| Effective.                                                                                                                                                                                                                     | CON     |
| Effective, but it can become monotonous if practiced all the time.                                                                                                                                                             | CON     |

CON control group, HIIT high-intensity interval training, TRE time-restricted eating, TREHIIT time-restricted eating and high-intensity interval training. Note: The authors have directly translated the quotes from Norwegian to English.

## Long-term adherence and perceptions questionnaire

TREHIT- A follow-up study ID-number

We ask you to fill out this questionnaire. Your answers are an important contribution to understand the adherence to time-restricted eating and/or high-intensity interval training after participating in a randomized controlled trial.

Please answer all the questions. Do not spend too long on each question. The first thing that comes to your mind is usually the correct answer.

Your answer must appear clearly. Use black or dark blue pen for filling. If you answer incorrectly, completely fill the square and check the correct box.

Today's date (ddmmYYYY): ..

|                      |
|----------------------|
| <b>INITIAL GROUP</b> |
|----------------------|

**1) Which group were you allocated to in the main study?**

- ☐ Time-restricted eating (Proceed to page 2)
- ☐ High-intensity interval training (Proceed to page 4)
- ☐ Time-restricted eating and High-intensity interval training (Fill out page 2-5)
- ☐ Control (Proceed to question 2)

**2) If you were in the control group, which group did you choose after post-tests?**

- ☐ Time-restricted eating (Proceed to page 2)
- ☐ High-intensity interval training (Proceed to page 3)
- ☐ Time-restricted eating and High-intensity interval training (Fill out page 2-3)
- ☐ No group (Proceed to page 6)

### TIME-RESTRICTED EATING

3) Have you continued with time-restricted eating (fully/partly) after study completion?

☐ YES ☐ NO

If YES

a) For how long did you continue with time-restricted eating?

Number of

☐ Some weeks ☐ ☐ weeks

☐ Some months ☐ ☐ months

☐ Still doing it

b) How long is/was your eating window on the weekdays?

☐ ☐ hours/day

Time window (timepoints): First meal: ☐ ☐ : ☐ ☐

Last meal: ☐ ☐ : ☐ ☐

c) How long is/was your eating window on the weekends?

☐ ☐ hours/day

Time window (timepoints): First meal: ☐ ☐ : ☐ ☐

Last meal: ☐ ☐ : ☐ ☐

d) How many days per week have you done time-restricted eating (on average)?

☐ days per week

If NO

e) What was the reason(s) for not continuing with time-restricted eating? You can check as many boxes as applies to you

☐ Did not align with work-schedule

☐ Family routines

☐ Didn't get the results I wanted

☐ Difficult to maintain in social situations

☐ Other reasons: \_\_\_\_\_

**4) Have you tried any other diet strategies before and/or after participating in the main study?**

☐ No

☐ 5:2 Periodic fasting

☐ Low carb

☐ Calorie counting

☐ Grethe Roede

☐ Other: \_\_\_\_\_

**a) How would you rate time-restricted eating compared with other diet strategies you have tried?  
(Mark with a cross)**

|            |   |   |   |                          |   |   |   |   |             |
|------------|---|---|---|--------------------------|---|---|---|---|-------------|
| 1          | 2 | 3 | 4 | 5                        | 6 | 7 | 8 | 9 | 10          |
| Much worse |   |   |   | Neither better nor worse |   |   |   |   | Much better |

Reason: \_\_\_\_\_

**5) Have you started with any exercise after study completion?**

☐ No

☐ Resistance training

☐ High-intensity interval training

☐ Group exercise at a gym

☐ Moderate-intensity continuous exercise

☐ Other: \_\_\_\_\_

|                                         |
|-----------------------------------------|
| <b>HIGH-INTENSITY INTERVAL TRAINING</b> |
|-----------------------------------------|

6) Have you continued with high-intensity interval training (fully/partly) after study completion?

☐ YES      ☐ NO

If YES

a) For how long did you continue with high-intensity interval training?

Number of

☐ Some weeks      ☐☐ weeks

☐ Some months      ☐☐ months

☐ Still doing it

b) How many days per week do you complete high-intensity interval training?

☐ days per week

c) What type of high-intensity interval training have you completed?

☐ 4 x 4

☐ 10 x 1

☐ Both

☐ Other: \_\_\_\_\_

If NO

d) What was the reason(s) for not continuing with high-intensity interval training? You can check as many boxes as applies to you

☐ Too hard

☐ Lack of time

☐ Boring

☐ Did not get the results I wanted

☐ Other: \_\_\_\_\_



**7) Have you started with any other form of exercise after study completion?**

- ☐ No ☐ Group exercise at a gym
- ☐ Moderate-intensity continuous exercise ☐ Other: \_\_\_\_\_
- ☐ Resistance training

**a) How would you rate high-intensity interval training compared with other exercise strategies you have tried? (Mark with a cross)**

|            |   |   |                          |   |   |   |             |   |    |
|------------|---|---|--------------------------|---|---|---|-------------|---|----|
| 1          | 2 | 3 | 4                        | 5 | 6 | 7 | 8           | 9 | 10 |
| Much worse |   |   | Neither better nor worse |   |   |   | Much better |   |    |

Reason:

\_\_\_\_\_

**8) Have you started with any dietary strategies after study completion?**

- ☐ No ☐ 5:2 Periodic fasting
- ☐ Time-restricted eating ☐ Calorie counting
- ☐ Low carb
- ☐ Grethe Roede ☐ Other: \_\_\_\_\_

|                      |
|----------------------|
| <b>CONTROL GROUP</b> |
|----------------------|

9) What was the reason(s) for not choosing a delayed intervention after study completion?

---

---

---

10) Have you started with any dietary strategies after study completion?

- |                                                 |                                               |
|-------------------------------------------------|-----------------------------------------------|
| <input type="checkbox"/> No                     | <input type="checkbox"/> 5:2 Periodic fasting |
| <input type="checkbox"/> Time-restricted eating | <input type="checkbox"/> Calorie counting     |
| <input type="checkbox"/> Low carb               |                                               |
| <input type="checkbox"/> Grethe Roede           | <input type="checkbox"/> Other: _____         |

11) Have you started with any other form of exercise after study completion?

- |                                                                 |                                                           |
|-----------------------------------------------------------------|-----------------------------------------------------------|
| <input type="checkbox"/> No                                     | <input type="checkbox"/> Group exercise at a gym          |
| <input type="checkbox"/> Moderate-intensity continuous exercise | <input type="checkbox"/> High-intensity interval training |
| <input type="checkbox"/> Resistance training                    | <input type="checkbox"/> Other: _____                     |
